# Supplementary material
Source: PubMed Central journal article supplement (PMC3358494)
Supplement: NIHMS367883-supplement-2.pdf [file NIHMS367883-supplement-2.pdf]

| Probe Set ID | Gene Title                              | Gene Symbol | Test= IL3+SCF signal / Control=IL3+ signal | FDR corrected p-value |
|--------------|-----------------------------------------|-------------|--------------------------------------------|-----------------------|
| <b>DOWN</b>  |                                         |             |                                            |                       |
| 1418095_at   | small muscle protein, X-linked          | Smpx        | -185.88                                    | 6.30E-12              |
| 1420583_a_at | RAR-related orphan receptor alpha       | Rora        | -39.60                                     | 1.57E-11              |
| 1425603_at   | transmembrane protein 176A              | Tmem176a    | -34.12                                     | 3.74E-10              |
| 1455165_at   | RAR-related orphan receptor alpha       | Rora        | -32.84                                     | 7.28E-14              |
| 1436325_at   | RAR-related orphan receptor alpha       | Rora        | -29.24                                     | 8.49E-11              |
| 1418004_a_at | transmembrane protein 176B              | Tmem176b    | -29.04                                     | 5.40E-10              |
| 1423909_at   | transmembrane protein 176A              | Tmem176a    | -26.58                                     | 5.87E-09              |
| 1416236_a_at | myelin protein zero-like 2              | Mpzl2       | -23.51                                     | 4.63E-04              |
| 1421471_at   | neuropeptide Y receptor Y1              | Npy1r       | -22.60                                     | 4.61E-04              |
| 1449455_at   | hemopoietic cell kinase                 | Hck         | -21.98                                     | 4.48E-09              |
| 1449175_at   | G-protein coupled receptor 65           | Gpr65       | -20.79                                     | 1.15E-07              |
| 1424034_at   | RAR-related orphan receptor alpha       | Rora        | -20.71                                     | 1.15E-12              |
| 1418782_at   | retinoid X receptor gamma               | Rxrg        | -18.54                                     | 4.05E-06              |
| 1458129_at   | RAR-related orphan receptor alpha       | Rora        | -17.96                                     | 5.64E-11              |
| 1441811_x_at | transmembrane protein 176A              | Tmem176a    | -17.30                                     | 1.49E-09              |
| 1450020_at   | chemokine (C-X3-C) receptor 1           | Cx3cr1      | -15.72                                     | 5.22E-09              |
| 1436326_at   | RAR-related orphan receptor alpha       | Rora        | -15.71                                     | 6.42E-09              |
| 1449220_at   | GTPase, IMAP family member 3 /// s      | Gimap3 ///  | -15.47                                     | 8.97E-10              |
| 1448499_a_at | epoxide hydrolase 2, cytoplasmic        | Ephx2       | -13.43                                     | 2.66E-04              |
| 1460602_at   | deleted in liver cancer 1               | Dlc1        | -12.86                                     | 1.63E-08              |
| 1422134_at   | FBJ osteosarcoma oncogene B             | Fosb        | -11.96                                     | 2.51E-04              |
| 1416022_at   | fatty acid binding protein 5, epidermal | Fabp5       | -10.98                                     | 8.47E-08              |
| 1456250_x_at | transforming growth factor, beta indu   | Tgfb1       | -10.74                                     | 7.29E-07              |
| 1424111_at   | insulin-like growth factor 2 receptor   | Igf2r       | -10.56                                     | 5.51E-08              |
| 1442542_at   | eyes absent 4 homolog (Drosophila)      | Eya4        | -10.28                                     | 3.85E-09              |
| 1452757_s_at | hemoglobin alpha, adult chain 1 /// h   | Hba-a1 ///  | -10.04                                     | 6.14E-10              |
| 1448123_s_at | transforming growth factor, beta indu   | Tgfb1       | -10.00                                     | 6.12E-07              |
| 1427345_a_at | sulfotransferase family 1A, phenol-p    | Sult1a1     | -9.94                                      | 5.74E-07              |
| 1451634_at   | antisense Igf2r RNA                     | Airn        | -9.89                                      | 2.84E-07              |
| 1436173_at   | deleted in liver cancer 1               | Dlc1        | -9.76                                      | 2.23E-09              |
| 1436823_x_at | hemoglobin Y, beta-like embryonic c     | Hbb-y       | -9.43                                      | 8.84E-08              |
| 1435981_at   | neuron navigator 2                      | Nav2        | -9.41                                      | 1.61E-07              |
| 1436717_x_at | hemoglobin Y, beta-like embryonic c     | Hbb-y       | -9.02                                      | 6.54E-09              |
| 1451204_at   | scavenger receptor class A, member 5    | Scara5      | -9.00                                      | 3.77E-10              |
| 1447500_at   | cut-like homeobox 2                     | Cux2        | -8.96                                      | 1.16E-07              |
| 1422009_at   | ATPase, Na+/K+ transporting, beta 2     | Atp1b2      | -8.94                                      | 2.03E-04              |
| 1415871_at   | transforming growth factor, beta indu   | Tgfb1       | -8.83                                      | 1.03E-04              |
| 1435148_at   | ATPase, Na+/K+ transporting, beta 2     | Atp1b2      | -8.36                                      | 1.28E-10              |
| 1422245_a_at | MRV integration site 1                  | Mrvi1       | -8.08                                      | 5.79E-05              |
| 1440801_s_at | adrenergic receptor kinase, beta 2      | Adrbk2      | -8.02                                      | 1.71E-06              |
| 1450019_at   | chemokine (C-X3-C) receptor 1           | Cx3cr1      | -7.99                                      | 2.85E-08              |
| 1454984_at   | leukemia inhibitory factor receptor     | Lifr        | -7.90                                      | 4.21E-07              |
| 1457108_at   | ---                                     | ---         | -7.83                                      | 1.44E-05              |
| 1425528_at   | paired related homeobox 1               | Prrx1       | -7.80                                      | 1.27E-08              |

|              |                                          |             |       |          |
|--------------|------------------------------------------|-------------|-------|----------|
| 1418804_at   | succinate receptor 1                     | Sucnr1      | -7.73 | 2.72E-08 |
| 1437463_x_at | transforming growth factor, beta indu    | Tgfbf1      | -7.70 | 2.69E-08 |
| 1455101_at   | phosphatase and actin regulator 2        | Phactr2     | -7.64 | 7.60E-08 |
| 1437498_at   | predicted gene 9971                      | Gm9971      | -7.38 | 2.80E-05 |
| 1450621_a_at | hemoglobin Y, beta-like embryonic c      | Hbb-y       | -7.35 | 7.43E-09 |
| 1428774_at   | glypican 6                               | Gpc6        | -7.11 | 8.96E-06 |
| 1451612_at   | metallothionein 1                        | Mt1         | -7.07 | 1.23E-07 |
| 1455869_at   | ---                                      | ---         | -7.04 | 8.18E-07 |
| 1460480_at   | endogenous retroviral sequence 3         | Erv3        | -7.02 | 7.72E-10 |
| 1420544_at   | germinal center expressed transcript     | Gcet2       | -6.98 | 7.23E-10 |
| 1423231_at   | neurogranin                              | Nrgn        | -6.95 | 2.99E-09 |
| 1447980_s_at | small G protein signaling modulator      | Sgsm1       | -6.95 | 2.19E-05 |
| 1416505_at   | nuclear receptor subfamily 4, group A    | Nr4a1       | -6.90 | 8.00E-04 |
| 1428361_x_at | hemoglobin alpha, adult chain 1 /// h    | Hba-a1 ///  | -6.75 | 1.52E-04 |
| 1429206_at   | Rho-related BTB domain containing        | Rhobtb1     | -6.69 | 2.35E-06 |
| 1432959_at   | RIKEN cDNA 4930447I22 gene               | 4930447I2   | -6.61 | 1.26E-05 |
| 1431182_at   | heat shock protein 8 /// hypothetical I  | Hspa8 /// I | -6.54 | 2.04E-05 |
| 1415949_at   | carboxypeptidase E /// similar to carb   | Cpe /// LO  | -6.53 | 1.42E-08 |
| 1452404_at   | phosphatase and actin regulator 2        | Phactr2     | -6.37 | 3.79E-10 |
| 1448785_at   | runt-related transcription factor 1; tra | Runx1t1     | -6.35 | 1.41E-09 |
| 1447046_at   | Uncoupling protein 2 (mitochondrial      | Ucp2        | -6.29 | 8.32E-06 |
| 1421571_a_at | similar to Lymphocyte antigen 6C pr      | LOC10004    | -6.28 | 3.73E-10 |
| 1444566_at   | Uncoupling protein 2 (mitochondrial      | Ucp2        | -6.26 | 2.47E-06 |
| 1443969_at   | insulin receptor substrate 2             | Irs2        | -6.25 | 2.09E-07 |
| 1425815_a_at | hyaluronan mediated motility recepto     | Hmmr        | -6.25 | 2.53E-08 |
| 1459665_s_at | MRV integration site 1                   | Mrvi1       | -6.24 | 2.05E-05 |
| 1416021_a_at | fatty acid binding protein 5, epiderma   | Fabp5 /// C | -6.15 | 1.86E-08 |
| 1456446_at   | RIKEN cDNA 4930523C07 gene               | 4930523C0   | -6.13 | 4.86E-09 |
| 1435172_at   | eomesodermin homolog (Xenopus la         | Eomes       | -6.06 | 1.45E-08 |
| 1440200_at   | family with sequence similarity 184,     | Fam184b     | -6.03 | 2.39E-11 |
| 1452291_at   | ArfGAP with RhoGAP domain, anky          | Arap2       | -6.01 | 8.76E-08 |
| 1427161_at   | centromere protein F                     | Cenpf       | -5.93 | 1.06E-07 |
| 1418981_at   | caspase 12                               | Casp12      | -5.92 | 6.09E-04 |
| 1422189_x_at | T-cell receptor gamma, variable 4        | Tcrp-V4     | -5.89 | 7.01E-09 |
| 1442582_at   | germinal center expressed transcript     | Gcet2       | -5.80 | 8.06E-11 |
| 1450521_a_at | T-cell receptor gamma, variable 4        | Tcrp-V4     | -5.79 | 4.87E-09 |
| 1430811_a_at | NUF2, NDC80 kinetochore complex          | Nuf2        | -5.71 | 8.30E-09 |
| 1450611_at   | orosomuroid 3                            | Orm3        | -5.71 | 5.50E-04 |
| 1453226_at   | kinesin family member 18B                | Kif18b      | -5.68 | 5.65E-04 |
| 1426001_at   | eomesodermin homolog (Xenopus la         | Eomes       | -5.63 | 4.79E-10 |
| 1452519_a_at | zinc finger protein 36                   | Zfp36       | -5.62 | 2.75E-04 |
| 1425526_a_at | paired related homeobox 1                | Prrx1       | -5.60 | 1.12E-06 |
| 1432960_at   | RIKEN cDNA 4930447I22 gene               | 4930447I2   | -5.59 | 1.86E-05 |
| 1439568_at   | gene regulated by estrogen in breast c   | Greb1 /// L | -5.58 | 8.98E-06 |
| 1438061_at   | RIKEN cDNA 4930523C07 gene               | 4930523C0   | -5.49 | 2.15E-08 |
| 1417701_at   | protein phosphatase 1, regulatory (inf   | Ppp1r14c    | -5.44 | 1.64E-07 |
| 1442878_at   | peroxiredoxin 6                          | Prdx6       | -5.42 | 6.80E-09 |
| 1449297_at   | caspase 12                               | Casp12      | -5.41 | 7.38E-06 |
| 1424278_a_at | baculoviral IAP repeat-containing 5      | Birc5       | -5.39 | 1.99E-06 |

|              |                                                        |             |       |          |
|--------------|--------------------------------------------------------|-------------|-------|----------|
| 1453590_at   | ADP-ribosylation factor-like 5B                        | Arl5b       | -5.39 | 8.24E-06 |
| 1424112_at   | insulin-like growth factor 2 receptor                  | Igf2r       | -5.35 | 2.02E-04 |
| 1421964_at   | Notch gene homolog 3 (Drosophila)                      | Notch3      | -5.29 | 9.53E-06 |
| 1439774_at   | paired related homeobox 1                              | Prrx1       | -5.28 | 5.82E-06 |
| 1431213_a_at | predicted gene 3579                                    | Gm3579      | -5.25 | 2.11E-07 |
| 1422188_s_at | T-cell receptor gamma, variable 2 ///                  | Tcrg-V2 /// | -5.24 | 1.64E-08 |
| 1451355_at   | alkaline ceramidase 2                                  | Acer2       | -5.18 | 2.26E-06 |
| 1419152_at   | RIKEN cDNA 2810417H13 gene                             | 2810417H13  | -5.17 | 2.07E-07 |
| 1433741_at   | CD38 antigen                                           | Cd38        | -5.12 | 5.77E-05 |
| 1448046_at   | Rab9 effector protein with kelch motif                 | Rabepk      | -5.05 | 7.20E-07 |
| 1456077_x_at | cell division cycle 25 homolog C (S. cerevisiae)       | Cdc25c      | -4.95 | 1.18E-04 |
| 1418736_at   | UDP-GalNAc:betaGlcNAc beta 1,3-galactosyltransferase 1 | B3galnt1    | -4.93 | 4.97E-04 |
| 1434423_at   | GULP, engulfment adaptor PTB domain                    | Gulp1       | -4.88 | 2.70E-08 |
| 1434091_at   | fatty acid amide hydrolase                             | Faah        | -4.88 | 1.29E-04 |
| 1452040_a_at | cell division cycle associated 3                       | Cdca3       | -4.88 | 5.58E-07 |
| 1433600_at   | adrenergic receptor, alpha 2a                          | Adra2a      | -4.83 | 1.61E-06 |
| 1416299_at   | Shc SH2-domain binding protein 1                       | Shcbp1      | -4.76 | 3.43E-10 |
| 1456634_at   | RIKEN cDNA 9830001H06 gene                             | 9830001H06  | -4.74 | 1.01E-03 |
| 1416258_at   | thymidine kinase 1                                     | Tk1         | -4.71 | 9.38E-09 |
| 1438934_x_at | sema domain, immunoglobulin domain                     | Sema4a      | -4.66 | 3.20E-06 |
| 1439736_at   | RIKEN cDNA 5830453J16 gene                             | 5830453J16  | -4.62 | 6.86E-07 |
| 1417910_at   | cyclin A2                                              | Ccna2       | -4.62 | 7.55E-08 |
| 1447363_s_at | budding uninhibited by benzimidazole 1                 | Bub1b       | -4.62 | 1.27E-07 |
| 1452242_at   | centrosomal protein 55                                 | Cep55       | -4.59 | 2.70E-06 |
| 1437187_at   | E2F transcription factor 7                             | E2f7        | -4.57 | 6.53E-05 |
| 1450758_at   | contactin associated protein-like 2                    | Cntnap2     | -4.55 | 5.87E-08 |
| 1441015_at   | ---                                                    | ---         | -4.53 | 3.25E-06 |
| 1448899_s_at | RAD51 associated protein 1                             | Rad51ap1    | -4.50 | 1.14E-07 |
| 1447979_at   | small G protein signaling modulator                    | Sgsm1       | -4.45 | 2.18E-04 |
| 1448925_at   | twist homolog 2 (Drosophila)                           | Twist2      | -4.44 | 3.00E-09 |
| 1421965_s_at | Notch gene homolog 3 (Drosophila)                      | Notch3      | -4.44 | 1.06E-06 |
| 1441286_at   | predicted gene 13948                                   | Gm13948     | -4.42 | 5.03E-05 |
| 1415899_at   | Jun-B oncogene                                         | Junb        | -4.41 | 3.47E-05 |
| 1438210_at   | G protein-coupled receptor 149                         | Gpr149      | -4.38 | 5.04E-06 |
| 1442881_at   | ---                                                    | ---         | -4.35 | 8.15E-04 |
| 1448830_at   | dual specificity phosphatase 1                         | Dusp1       | -4.35 | 8.12E-06 |
| 1439874_at   | RIKEN cDNA 9330102E08 gene                             | 9330102E08  | -4.34 | 1.21E-05 |
| 1415904_at   | lipoprotein lipase                                     | Lpl         | -4.33 | 3.74E-09 |
| 1439040_at   | centromere protein E                                   | Cenpe       | -4.28 | 1.73E-07 |
| 1416756_at   | DnaJ (Hsp40) homolog, subfamily B                      | Dnajb1      | -4.24 | 5.37E-05 |
| 1456280_at   | claspin homolog (Xenopus laevis)                       | Clspn       | -4.24 | 9.95E-07 |
| 1452004_at   | calcitonin/calcitonin-related polypeptide              | Calca       | -4.23 | 9.73E-05 |
| 1432129_a_at | paired related homeobox 1                              | Prrx1       | -4.20 | 2.31E-06 |
| 1425452_s_at | family with sequence similarity 84, member 1           | Fam84a      | -4.15 | 9.68E-07 |
| 1452958_at   | aspartate beta-hydroxylase domain containing           | Asphd2      | -4.14 | 2.06E-05 |
| 1448575_at   | interleukin 7 receptor                                 | Il7r        | -4.09 | 1.56E-04 |
| 1439377_x_at | cell division cycle 20 homolog (S. cerevisiae)         | Cdc20       | -4.08 | 9.59E-07 |
| 1430574_at   | cyclin-dependent kinase inhibitor 3                    | Cdkn3       | -4.04 | 2.32E-07 |
| 1453557_at   | RIKEN cDNA 4930562F07 gene                             | 4930562F07  | -4.03 | 4.69E-08 |

|              |                                        |             |       |          |
|--------------|----------------------------------------|-------------|-------|----------|
| 1424046_at   | budding uninhibited by benzimidazol    | Bub1        | -4.03 | 9.01E-08 |
| 1419088_at   | tissue inhibitor of metalloproteinase  | Timp3       | -4.01 | 2.51E-07 |
| 1448110_at   | sema domain, immunoglobulin doma       | Sema4a      | -4.01 | 9.77E-06 |
| 1417409_at   | Jun oncogene                           | Jun         | -3.98 | 2.12E-04 |
| 1456636_at   | RIKEN cDNA 4930414L22 gene             | 4930414L2   | -3.94 | 7.22E-05 |
| 1419091_a_at | annexin A2                             | Anxa2       | -3.94 | 2.84E-05 |
| 1434437_x_at | ribonucleotide reductase M2            | Rrm2        | -3.92 | 3.47E-05 |
| 1438763_at   | dynein, axonemal, heavy chain 2        | Dnahc2      | -3.86 | 1.52E-05 |
| 1437611_x_at | kinesin family member 2C               | Kif2c       | -3.86 | 8.82E-09 |
| 1434450_s_at | adrenergic receptor kinase, beta 2     | Adrbk2      | -3.85 | 1.79E-09 |
| 1417938_at   | RAD51 associated protein 1             | Rad51ap1    | -3.84 | 7.35E-10 |
| 1418106_at   | hairy/enhancer-of-split related with Y | Hey2        | -3.83 | 2.21E-06 |
| 1419161_a_at | NADPH oxidase 4                        | Nox4        | -3.82 | 3.99E-08 |
| 1435845_at   | ---                                    | ---         | -3.82 | 4.17E-07 |
| 1434496_at   | polo-like kinase 3 (Drosophila)        | Plk3        | -3.82 | 2.31E-05 |
| 1429350_at   | EP300 interacting inhibitor of differe | Eid3        | -3.80 | 4.52E-05 |
| 1449335_at   | tissue inhibitor of metalloproteinase  | Timp3       | -3.80 | 1.14E-08 |
| 1415810_at   | ubiquitin-like, containing PHD and R   | Uhrf1       | -3.78 | 4.71E-06 |
| 1416076_at   | cyclin B1 /// predicted gene 5593 ///  | Ccnb1 /// C | -3.78 | 2.16E-04 |
| 1430581_at   | BCL2-associated transcription factor   | Belaf1      | -3.77 | 3.20E-07 |
| 1441115_at   | DNA segment, Chr 18, ERATO Doi         | D18Ertd23   | -3.76 | 4.02E-09 |
| 1431623_at   | RIKEN cDNA 1700023H06 gene             | 1700023H0   | -3.76 | 1.06E-04 |
| 1456665_at   | eyes absent 4 homolog (Drosophila)     | Eya4        | -3.75 | 5.15E-06 |
| 1416630_at   | inhibitor of DNA binding 3             | Id3         | -3.74 | 1.52E-07 |
| 1418901_at   | CCAAT/enhancer binding protein (C      | Cebpb       | -3.72 | 7.04E-06 |
| 1452314_at   | kinesin family member 11               | Kif11       | -3.71 | 4.94E-06 |
| 1416309_at   | nucleolar and spindle associated prot  | Nusap1      | -3.66 | 3.56E-06 |
| 1450920_at   | cyclin B2                              | Ccnb2       | -3.66 | 1.19E-07 |
| 1450790_at   | thyroglobulin                          | Tg          | -3.66 | 5.87E-08 |
| 1456311_x_at | establishment of cohesion 1 homolog    | Esco2       | -3.66 | 5.15E-08 |
| 1441284_at   | ---                                    | ---         | -3.65 | 8.72E-07 |
| 1440109_at   | DNA segment, Chr 7, ERATO Doi 4        | D7Ertd413   | -3.65 | 3.67E-04 |
| 1460319_at   | fucosyltransferase 8                   | Fut8        | -3.65 | 4.33E-10 |
| 1422798_at   | contactin associated protein-like 2    | Cntnap2     | -3.64 | 3.02E-08 |
| 1427329_a_at | immunoglobulin heavy chain 6 (heav     | Igh-6       | -3.63 | 6.30E-04 |
| 1445467_at   | ---                                    | ---         | -3.63 | 4.54E-08 |
| 1443604_at   | ---                                    | ---         | -3.61 | 5.18E-07 |
| 1448929_at   | coagulation factor XIII, A1 subunit    | F13a1       | -3.60 | 2.29E-06 |
| 1439750_at   | ---                                    | ---         | -3.59 | 4.99E-08 |
| 1425624_at   | EPM2A (laforin) interacting protein    | Epm2aip1    | -3.59 | 1.49E-05 |
| 1419297_at   | histocompatibility 2, O region alpha   | H2-Oa       | -3.57 | 1.16E-09 |
| 1429171_a_at | non-SMC condensin I complex, subu      | Ncapg       | -3.56 | 8.59E-06 |
| 1460368_at   | membrane protein, palmitoylated 4 (I   | Mpp4        | -3.56 | 7.22E-06 |
| 1427119_at   | serine peptidase inhibitor, Kazal type | Spink4      | -3.56 | 8.20E-08 |
| 1441163_at   | mediator of RNA polymerase II trans    | Med12l      | -3.55 | 1.83E-09 |
| 1439153_at   | ring finger protein 144B               | Rnf144b     | -3.53 | 1.69E-04 |
| 1459021_at   | ---                                    | ---         | -3.52 | 1.21E-05 |
| 1427222_a_at | seminal vesicle secretory protein 4    | Svs4        | -3.51 | 1.83E-04 |
| 1449334_at   | tissue inhibitor of metalloproteinase  | Timp3       | -3.51 | 3.86E-08 |

|              |                                          |             |       |          |
|--------------|------------------------------------------|-------------|-------|----------|
| 1419816_s_at | ERBB receptor feedback inhibitor 1       | Errfi1      | -3.50 | 6.67E-05 |
| 1450544_at   | coiled-coil domain containing 48         | Ccdc48      | -3.50 | 7.10E-05 |
| 1435575_at   | kinetochore associated 1                 | Kntc1       | -3.50 | 1.38E-06 |
| 1419082_at   | serine (or cysteine) peptidase inhibitor | Serpinb2    | -3.49 | 1.53E-06 |
| 1437488_at   | solute carrier family 9 (sodium/hydro    | Slc9a9      | -3.49 | 2.46E-07 |
| 1416125_at   | FK506 binding protein 5                  | Fkbp5       | -3.48 | 1.94E-06 |
| 1436723_at   | centromere protein I                     | Cenpi       | -3.48 | 9.51E-05 |
| 1427707_a_at | Scf/Tal1 interrupting locus              | Stil        | -3.47 | 7.63E-04 |
| 1456367_at   | fucosyltransferase 8                     | Fut8        | -3.46 | 1.74E-08 |
| 1438307_at   | high mobility group box 2                | Hmgb2       | -3.46 | 1.18E-05 |
| 1455695_at   | ST8 alpha-N-acetyl-neuraminide alphi     | St8sia1     | -3.45 | 2.42E-08 |
| 1442280_at   | DNA segment, Chr 2, ERATO Doi 7          | D2Ertd750   | -3.44 | 4.43E-04 |
| 1451069_at   | proviral integration site 3              | Pim3        | -3.44 | 3.24E-06 |
| 1437900_at   | RIKEN cDNA 4930523C07 gene               | 4930523C0   | -3.43 | 8.03E-08 |
| 1449851_at   | period homolog 1 (Drosophila)            | Per1        | -3.43 | 3.99E-06 |
| 1440663_at   | ---                                      | ---         | -3.43 | 8.61E-07 |
| 1452954_at   | ubiquitin-conjugating enzyme E2C         | Ube2c       | -3.43 | 1.40E-04 |
| 1425919_at   | NADH dehydrogenase (ubiquinone)          | Ndufa12     | -3.42 | 2.82E-04 |
| 1455166_at   | ADP-ribosylation factor-like 5B          | Arl5b       | -3.42 | 1.31E-05 |
| 1449382_at   | solute carrier family 6 (neurotransmi    | Slc6a12     | -3.42 | 5.08E-09 |
| 1437884_at   | ADP-ribosylation factor-like 5B          | Arl5b       | -3.41 | 4.60E-05 |
| 1454694_a_at | topoisomerase (DNA) II alpha             | Top2a       | -3.38 | 6.76E-09 |
| 1443027_at   | ---                                      | ---         | -3.36 | 3.11E-09 |
| 1453103_at   | actin-binding LIM protein 1              | Ablim1      | -3.34 | 5.04E-08 |
| 1437181_at   | pellino 2                                | Peli2       | -3.34 | 2.91E-08 |
| 1460218_at   | CD52 antigen                             | Cd52        | -3.32 | 5.68E-07 |
| 1446553_at   | ---                                      | ---         | -3.32 | 4.70E-08 |
| 1423521_at   | lamin B1                                 | Lmnb1       | -3.30 | 4.15E-07 |
| 1459962_at   | RIKEN cDNA 4930523C07 gene               | 4930523C0   | -3.29 | 2.34E-07 |
| 1428393_at   | neuritin 1                               | Nrn1        | -3.25 | 1.85E-08 |
| 1455609_at   | citron                                   | Cit         | -3.24 | 1.63E-04 |
| 1452305_s_at | centromere protein N                     | Cenpn       | -3.24 | 9.06E-04 |
| 1448113_at   | stathmin 1                               | Stmn1       | -3.23 | 1.03E-07 |
| 1435306_a_at | kinesin family member 11                 | Kif11       | -3.23 | 7.04E-05 |
| 1417828_at   | aquaporin 8                              | Aqp8        | -3.23 | 7.57E-08 |
| 1448226_at   | ribonucleotide reductase M2              | Rrm2        | -3.23 | 2.34E-06 |
| 1437605_at   | nephrosis 2 homolog, podocin (huma       | Nphs2       | -3.22 | 1.47E-04 |
| 1418936_at   | v-maf musculoaponeurotic fibrosarcd      | Maff        | -3.21 | 5.50E-05 |
| 1455257_at   | integrin beta 3                          | Itgb3       | -3.21 | 1.04E-05 |
| 1448314_at   | cyclin-dependent kinase 1                | Cdk1        | -3.21 | 1.69E-06 |
| 1420685_at   | GRB2-related adaptor protein 2 /// si    | Grap2 /// L | -3.20 | 8.64E-07 |
| 1419089_at   | tissue inhibitor of metalloproteinase    | Timp3       | -3.20 | 3.84E-07 |
| 1433719_at   | solute carrier family 9 (sodium/hydro    | Slc9a9      | -3.20 | 3.29E-08 |
| 1452073_at   | family with sequence similarity 64, n    | Fam64a      | -3.19 | 1.01E-04 |
| 1456139_at   | antisense Igf2r RNA                      | Airn        | -3.19 | 4.15E-04 |
| 1448928_at   | histone deacetylase 6                    | Hdac6       | -3.17 | 3.45E-07 |
| 1433893_s_at | sperm associated antigen 5               | Spag5       | -3.16 | 8.29E-08 |
| 1417821_at   | DNA segment, Chr 17, human D6S5          | D17H6S56    | -3.15 | 7.42E-05 |
| 1417911_at   | cyclin A2                                | Ccna2       | -3.15 | 1.61E-09 |

|              |                                          |             |       |          |
|--------------|------------------------------------------|-------------|-------|----------|
| 1431087_at   | SPC24, NDC80 kinetochore complex         | Spc24       | -3.15 | 6.00E-06 |
| 1424060_at   | nei like 3 (E. coli)                     | Neil3       | -3.15 | 5.03E-07 |
| 1439997_at   | synaptojanin 1                           | Synj1       | -3.13 | 4.09E-05 |
| 1426817_at   | antigen identified by monoclonal anti    | Mki67       | -3.13 | 5.73E-07 |
| 1433543_at   | anillin, actin binding protein           | Anln        | -3.12 | 4.63E-08 |
| 1416271_at   | PERP, TP53 apoptosis effector            | Perp        | -3.12 | 1.06E-04 |
| 1449903_at   | cytotoxic and regulatory T cell molec    | Crtam       | -3.12 | 3.04E-05 |
| 1432520_at   | immunoglobulin heavy chain (J558 f       | Igh-VJ558   | -3.10 | 2.09E-04 |
| 1419386_at   | mucin 13, epithelial transmembrane       | Muc13       | -3.10 | 1.41E-05 |
| 1435511_at   | synapsin II                              | Syn2        | -3.10 | 3.67E-07 |
| 1437449_at   | radical S-adenosyl methionine domai      | Rsad1       | -3.10 | 1.72E-05 |
| 1448823_at   | chemokine (C-X-C motif) ligand 12        | Cxcl12      | -3.09 | 7.44E-06 |
| 1448627_s_at | PDZ binding kinase                       | Pbk         | -3.08 | 9.45E-07 |
| 1448231_at   | FK506 binding protein 5                  | Fkbp5       | -3.08 | 5.76E-07 |
| 1438009_at   | predicted gene 11276 /// histone clus    | Gm11276     | -3.08 | 8.51E-06 |
| 1453771_at   | GULP, engulfment adaptor PTB dom         | Gulp1       | -3.07 | 1.02E-06 |
| 1418281_at   | RAD51 homolog (S. cerevisiae)            | Rad51       | -3.07 | 7.20E-04 |
| 1452703_at   | S-adenosylhomocysteine hydrolase-l       | Ahcy12      | -3.06 | 1.46E-08 |
| 1457356_at   | ---                                      | ---         | -3.06 | 7.33E-05 |
| 1442820_at   | ---                                      | ---         | -3.05 | 1.21E-06 |
| 1428304_at   | establishment of cohesion 1 homolog      | Esco2       | -3.04 | 4.45E-06 |
| 1443777_at   | ---                                      | ---         | -3.04 | 5.91E-07 |
| 1420081_s_at | DNA segment, Chr 2, ERATO Doi 7          | D2Ertd750   | -3.04 | 7.16E-07 |
| 1416961_at   | budding uninhibited by benzimidazol      | Bub1b       | -3.03 | 1.32E-05 |
| 1420082_at   | DNA segment, Chr 2, ERATO Doi 7          | D2Ertd750   | -3.02 | 1.08E-06 |
| 1417822_at   | DNA segment, Chr 17, human D6S5          | D17H6S56    | -3.02 | 9.49E-05 |
| 1442572_at   | ---                                      | ---         | -3.02 | 1.80E-04 |
| 1452220_at   | dedicator of cytokinesis 1               | Dock1       | -3.02 | 1.98E-05 |
| 1421511_at   | integrin beta 3                          | Itgb3       | -3.01 | 5.49E-07 |
| 1444615_x_at | runt-related transcription factor 1; tra | Runx1t1     | -3.00 | 3.93E-07 |
| 1423520_at   | lamin B1                                 | Lmnb1       | -2.98 | 2.15E-09 |
| 1421963_a_at | cell division cycle 25 homolog B (S.     | Cdc25b      | -2.98 | 1.92E-06 |
| 1428535_at   | RIKEN cDNA 9430020K01 gene               | 9430020K01  | -2.97 | 8.08E-04 |
| 1450156_a_at | hyaluronan mediated motility recepto     | Hmmr        | -2.97 | 1.44E-05 |
| 1419486_at   | forkhead box C1                          | Foxc1       | -2.97 | 4.22E-08 |
| 1422430_at   | fidgetin-like 1                          | Figl1       | -2.94 | 1.56E-05 |
| 1424118_a_at | SPC25, NDC80 kinetochore complex         | Spc25       | -2.94 | 3.47E-05 |
| 1419944_at   | Cyclin B1                                | Ccnb1       | -2.93 | 1.30E-06 |
| 1427541_x_at | hyaluronan mediated motility recepto     | Hmmr        | -2.93 | 2.27E-05 |
| 1432582_at   | RIKEN cDNA 3110054G05 gene               | 3110054G05  | -2.93 | 9.21E-04 |
| 1422264_s_at | Kruppel-like factor 9                    | Klf9        | -2.91 | 1.24E-04 |
| 1428294_at   | zinc finger protein 259                  | Zfp259      | -2.91 | 2.16E-07 |
| 1419387_s_at | mucin 13, epithelial transmembrane       | Muc13       | -2.91 | 1.89E-05 |
| 1448576_at   | interleukin 7 receptor                   | Il7r        | -2.88 | 4.85E-05 |
| 1423920_at   | non-SMC condensin I complex, subu        | Ncaph       | -2.88 | 8.16E-05 |
| 1436808_x_at | minichromosome maintenance defici        | Mcm5        | -2.86 | 1.95E-05 |
| 1449802_x_at | RNA pseudouridylate synthase doma        | Rpusd2      | -2.86 | 5.05E-04 |
| 1449030_at   | synapsin II                              | Syn2        | -2.85 | 3.35E-08 |
| 1455904_at   | growth arrest specific 5 /// small nucl  | Gas5 /// Sn | -2.84 | 5.73E-06 |

|              |                                        |           |       |          |
|--------------|----------------------------------------|-----------|-------|----------|
| 1426071_at   | TGF-beta1-induced anti-apoptotic fa    | Tiaf2     | -2.84 | 3.06E-04 |
| 1453596_at   | inhibitor of DNA binding 2             | Id2       | -2.84 | 9.62E-07 |
| 1457851_at   | ---                                    | ---       | -2.83 | 4.99E-05 |
| 1441946_at   | inter-alpha (globulin) inhibitor H5    | Itih5     | -2.83 | 1.65E-05 |
| 1443552_at   | RIKEN cDNA E230008N13 gene             | E230008N  | -2.83 | 6.34E-06 |
| 1436763_a_at | Kruppel-like factor 9                  | Klf9      | -2.83 | 7.23E-06 |
| 1429172_a_at | non-SMC condensin I complex, subu      | Ncapg     | -2.82 | 7.33E-07 |
| 1419695_at   | ST8 alpha-N-acetyl-neuraminide alpl    | St8sia1   | -2.81 | 2.47E-05 |
| 1436203_a_at | RIKEN cDNA 1110059G02 gene             | 1110059G0 | -2.81 | 9.02E-07 |
| 1436204_at   | RIKEN cDNA 1110059G02 gene             | 1110059G0 | -2.80 | 1.52E-05 |
| 1442833_at   | DNA segment, Chr 15, ERATO Doi         | D15Ertd30 | -2.80 | 2.40E-06 |
| 1436368_at   | solute carrier family 16 (monocarbox   | Slc16a10  | -2.79 | 1.18E-06 |
| 1427365_at   | keratin 86                             | Krt86     | -2.78 | 2.91E-08 |
| 1417574_at   | chemokine (C-X-C motif) ligand 12      | Cxcl12    | -2.77 | 3.88E-04 |
| 1441799_at   | RIKEN cDNA 6030422H21 gene             | 6030422H2 | -2.76 | 1.13E-07 |
| 1435987_x_at | RIKEN cDNA 1110059G02 gene             | 1110059G0 | -2.75 | 7.34E-06 |
| 1440290_at   | predicted gene 10010                   | Gm10010   | -2.75 | 4.20E-06 |
| 1440363_at   | ---                                    | ---       | -2.74 | 3.67E-04 |
| 1438288_x_at | RIKEN cDNA 1110059G02 gene             | 1110059G0 | -2.73 | 1.49E-06 |
| 1451827_a_at | NADPH oxidase 4                        | Nox4      | -2.72 | 1.01E-05 |
| 1421088_at   | glypican 4                             | Gpc4      | -2.72 | 5.74E-04 |
| 1453107_s_at | RIKEN cDNA 4933413G19 gene ///         | 4933413G  | -2.72 | 1.05E-04 |
| 1422814_at   | asp (abnormal spindle)-like, microce   | Aspm      | -2.72 | 3.50E-06 |
| 1418776_at   | guanylate-binding protein 8            | Gbp8      | -2.71 | 1.57E-06 |
| 1442000_at   | major facilitator superfamily domain   | Mfsd2b    | -2.70 | 2.49E-04 |
| 1434592_at   | solute carrier family 16 (monocarbox   | Slc16a10  | -2.70 | 1.14E-05 |
| 1460230_at   | synapsin II                            | Syn2      | -2.69 | 9.95E-06 |
| 1438527_at   | predicted gene 12816 /// predicted ge  | Gm12816   | -2.69 | 9.33E-06 |
| 1434767_at   | expressed sequence C79407              | C79407    | -2.69 | 2.61E-07 |
| 1451246_s_at | aurora kinase B                        | Aurkb     | -2.69 | 2.46E-08 |
| 1459429_at   | kinectin 1                             | Ktn1      | -2.69 | 9.97E-04 |
| 1422498_at   | melanoma antigen, family H, 1          | Mageh1    | -2.68 | 4.51E-06 |
| 1437370_at   | shugoshin-like 2 (S. pombe)            | Sgol2     | -2.67 | 5.65E-07 |
| 1418536_at   | histocompatibility 2, Q region locus   | H2-Q7     | -2.67 | 4.74E-06 |
| 1429656_at   | Rho-related BTB domain containing      | Rhobtb1   | -2.66 | 1.19E-04 |
| 1435393_at   | melanocortin 1 receptor                | Mc1r      | -2.65 | 1.42E-04 |
| 1423626_at   | dystonin                               | Dst       | -2.65 | 6.09E-07 |
| 1424128_x_at | aurora kinase B                        | Aurkb     | -2.65 | 3.43E-04 |
| 1415874_at   | similar to sprouty 1 /// sprouty homol | LOC10004  | -2.64 | 1.46E-04 |
| 1423635_at   | bone morphogenetic protein 2           | Bmp2      | -2.64 | 9.58E-06 |
| 1428481_s_at | cell division cycle associated 8       | Cdca8     | -2.63 | 1.08E-06 |
| 1434748_at   | cytoskeleton associated protein 2      | Ckap2     | -2.63 | 8.93E-08 |
| 1423774_a_at | protein regulator of cytokinesis 1     | Prc1      | -2.62 | 3.11E-07 |
| 1418021_at   | complement component 4B (Childo t      | C4b       | -2.61 | 2.56E-06 |
| 1438833_at   | cancer susceptibility candidate 5      | Casc5     | -2.61 | 1.96E-04 |
| 1416835_s_at | S-adenosylmethionine decarboxylase     | Amd1      | -2.60 | 8.81E-06 |
| 1453082_at   | tubby-like protein 3                   | Tulp3     | -2.60 | 5.41E-08 |
| 1451691_at   | endothelin receptor type A             | Ednra     | -2.60 | 7.82E-05 |
| 1456328_at   | B-cell scaffold protein with ankyrin r | Bank1     | -2.59 | 1.48E-07 |

|              |                                       |            |       |          |
|--------------|---------------------------------------|------------|-------|----------|
| 1436755_at   | inter-alpha (globulin) inhibitor H5   | Itih5      | -2.58 | 4.24E-04 |
| 1458968_at   | expressed sequence C80283             | C80283     | -2.57 | 4.77E-04 |
| 1423753_at   | BMP and activin membrane-bound in     | Bambi      | -2.57 | 4.68E-06 |
| 1429682_at   | family with sequence similarity 46, n | Fam46c     | -2.57 | 1.48E-07 |
| 1416442_at   | immediate early response 2            | Ier2       | -2.57 | 2.69E-04 |
| 1417635_at   | sperm autoantigenic protein 17        | Spa17      | -2.57 | 1.30E-04 |
| 1433525_at   | endothelin receptor type A            | Ednra      | -2.56 | 4.15E-06 |
| 1459978_x_at | cyclin J-like                         | Ccnj1      | -2.56 | 1.94E-06 |
| 1423775_s_at | protein regulator of cytokinesis 1    | Prc1       | -2.56 | 2.65E-07 |
| 1444089_at   | spectrin beta 2                       | Spnb2      | -2.55 | 8.75E-07 |
| 1436966_at   | pellino 2                             | Peli2      | -2.54 | 8.62E-06 |
| 1436847_s_at | cell division cycle associated 8      | Cdca8      | -2.54 | 1.66E-06 |
| 1419406_a_at | B-cell CLL/lymphoma 11A (zinc fin     | Bcl11a     | -2.53 | 1.04E-05 |
| 1449171_at   | Ttk protein kinase                    | Ttk        | -2.52 | 1.44E-05 |
| 1419153_at   | RIKEN cDNA 2810417H13 gene            | 2810417H   | -2.51 | 3.38E-05 |
| 1441189_at   | ---                                   | ---        | -2.51 | 1.75E-04 |
| 1417784_at   | amyotrophic lateral sclerosis 2 (juve | Als2       | -2.51 | 2.24E-05 |
| 1426818_at   | arrestin domain containing 4          | Arrdc4     | -2.50 | 1.13E-04 |
| 1459993_at   | ---                                   | ---        | -2.50 | 1.15E-05 |
| 1419943_s_at | cyclin B1                             | Ccnb1      | -2.50 | 1.98E-06 |
| 1423100_at   | FBJ osteosarcoma oncogene             | Fos        | -2.48 | 3.16E-05 |
| 1448530_at   | guanosine monophosphate reductase     | Gmpr /// L | -2.47 | 7.52E-05 |
| 1457996_at   | ---                                   | ---        | -2.46 | 2.34E-07 |
| 1446509_at   | spermine oxidase                      | Smox       | -2.46 | 8.20E-08 |
| 1439178_at   | adrenergic receptor kinase, beta 2    | Adrbk2     | -2.45 | 1.51E-04 |
| 1429268_at   | RIKEN cDNA 2610318N02 gene            | 2610318N0  | -2.45 | 3.74E-05 |
| 1452473_at   | proline rich 15                       | Prr15      | -2.44 | 1.27E-06 |
| 1420271_at   | ---                                   | ---        | -2.44 | 1.64E-04 |
| 1456341_a_at | Kruppel-like factor 9                 | Klf9       | -2.44 | 7.97E-06 |
| 1428105_at   | TPX2, microtubule-associated protei   | Tpx2       | -2.43 | 2.11E-06 |
| 1423714_at   | ASF1 anti-silencing function 1 homo   | Asf1b      | -2.42 | 3.16E-06 |
| 1437176_at   | NLR family, CARD domain containi      | Nlrc5      | -2.42 | 9.63E-06 |
| 1417332_at   | regulatory factor X, 2 (influences HI | Rfx2       | -2.41 | 8.86E-08 |
| 1421946_at   | C-reactive protein, pentraxin-related | Crp        | -2.40 | 4.80E-06 |
| 1429159_at   | inter-alpha (globulin) inhibitor H5   | Itih5      | -2.40 | 8.07E-06 |
| 1455730_at   | discs, large (Drosophila) homolog-as  | Dlgap5     | -2.40 | 3.20E-07 |
| 1415913_at   | predicted gene 15483 /// ribosomal p  | Gm15483 /  | -2.40 | 8.33E-05 |
| 1439281_at   | solute carrier family 26, member 8    | Slc26a8    | -2.40 | 1.31E-04 |
| 1435336_at   | cadherin, EGF LAG seven-pass G-ty     | Celsr2     | -2.39 | 9.76E-04 |
| 1457072_at   | B-cell CLL/lymphoma 11A (zinc fin     | Bcl11a     | -2.39 | 3.30E-05 |
| 1448205_at   | cyclin B1                             | Ccnb1      | -2.39 | 7.78E-07 |
| 1437658_a_at | small nucleolar RNA host gene (non-   | Snhg1      | -2.38 | 1.29E-06 |
| 1444467_at   | expressed sequence C77534             | C77534     | -2.38 | 5.82E-04 |
| 1418982_at   | CCAAT/enhancer binding protein (C     | Cebpa      | -2.37 | 9.20E-05 |
| 1427141_at   | NDC80 homolog, kinetochore compl      | 2700099C   | -2.37 | 3.17E-06 |
| 1439819_at   | expressed sequence AU015263           | AU015263   | -2.36 | 2.83E-05 |
| 1456901_at   | a disintegrin-like and metallopeptida | Adamts20   | -2.36 | 3.40E-04 |
| 1455983_at   | cell division cycle associated 2      | Cdca2      | -2.36 | 1.54E-04 |
| 1422016_a_at | centromere protein H                  | Cenph      | -2.35 | 1.46E-07 |



|              |                                        |           |       |          |
|--------------|----------------------------------------|-----------|-------|----------|
| 1419137_at   | SH3/ankyrin domain gene 3              | Shank3    | -2.35 | 3.35E-07 |
| 1434661_at   | synaptogyrin 1                         | Syng1     | -2.35 | 7.10E-05 |
| 1420691_at   | interleukin 2 receptor, alpha chain    | Il2ra     | -2.34 | 9.53E-08 |
| 1448688_at   | podocalyxin-like                       | Podxl     | -2.34 | 2.24E-04 |
| 1421113_at   | pepsinogen 5, group I                  | Pga5      | -2.34 | 3.10E-06 |
| 1447494_at   | DNA segment, Chr 7, Brigham & W        | D7Bwg082  | -2.34 | 7.87E-05 |
| 1448325_at   | protein phosphatase 1, regulatory (in  | Ppp1r15a  | -2.34 | 3.45E-06 |
| 1454744_at   | RIKEN cDNA F630043A04 gene             | F630043A  | -2.33 | 4.19E-05 |
| 1452459_at   | asp (abnormal spindle)-like, microce   | Aspm      | -2.33 | 2.56E-04 |
| 1446119_at   | ---                                    | ---       | -2.33 | 8.73E-07 |
| 1415945_at   | minichromosome maintenance defici      | Mcm5      | -2.32 | 5.22E-06 |
| 1420889_at   | holocytochrome c synthetase            | Hccs      | -2.32 | 3.69E-05 |
| 1416155_at   | high mobility group box 3              | Hmgb3     | -2.32 | 1.58E-06 |
| 1440762_at   | synapsin II                            | Syn2      | -2.32 | 1.21E-05 |
| 1437782_at   | contactin associated protein-like 2    | Cntnap2   | -2.31 | 4.10E-05 |
| 1419289_a_at | synaptogyrin 1                         | Syng1     | -2.31 | 4.39E-04 |
| 1441964_at   | quaking                                | Qk        | -2.30 | 7.86E-08 |
| 1429097_at   | ring finger protein 150                | Rnf150    | -2.29 | 9.07E-05 |
| 1439470_at   | ---                                    | ---       | -2.29 | 1.03E-07 |
| 1423809_at   | transcription factor 19                | Tcf19     | -2.28 | 1.19E-05 |
| 1436211_at   | THO complex 4                          | Thoc4     | -2.28 | 2.51E-05 |
| 1448650_a_at | polymerase (DNA directed), epsilon     | Pole      | -2.27 | 4.81E-04 |
| 1442414_at   | Ring finger protein 103                | Rnf103    | -2.27 | 8.44E-07 |
| 1430983_at   | protein disulfide isomerase associate  | Pdia6     | -2.27 | 4.56E-05 |
| 1459760_at   | NADH dehydrogenase (ubiquinone)        | Ndufs4    | -2.26 | 1.72E-05 |
| 1424143_a_at | chromatin licensing and DNA replica    | Cdt1      | -2.26 | 5.16E-05 |
| 1428460_at   | synapsin II                            | Syn2      | -2.26 | 5.11E-04 |
| 1416129_at   | ERBB receptor feedback inhibitor 1     | Errfi1    | -2.26 | 7.92E-06 |
| 1431119_at   | DnaJ (Hsp40) related, subfamily B, r   | Dnajb13   | -2.26 | 5.16E-04 |
| 1417995_at   | protein tyrosine phosphatase, non-red  | Ptpn22    | -2.26 | 4.93E-09 |
| 1441083_at   | cleft lip and palate associated transm | Clptm1    | -2.25 | 2.19E-05 |
| 1441986_at   | zinc finger, CCHC domain containin     | Zcchc6    | -2.25 | 1.10E-04 |
| 1460292_a_at | SWI/SNF related, matrix associated,    | Smarca1   | -2.25 | 7.74E-04 |
| 1442263_at   | regulator of G-protein signaling 13    | Rgs13     | -2.24 | 2.40E-06 |
| 1442643_at   | KDM1 lysine (K)-specific demethyla     | Kdm6b     | -2.24 | 4.77E-04 |
| 1433448_at   | solute carrier family 25, member 44    | Slc25a44  | -2.24 | 2.83E-07 |
| 1460515_at   | RIKEN cDNA 8430419K02 gene             | 8430419K0 | -2.22 | 2.14E-06 |
| 1442941_at   | expressed sequence C77027              | C77027    | -2.22 | 6.29E-04 |
| 1454703_x_at | small nucleolar RNA host gene (non-    | Snhg1     | -2.22 | 3.32E-06 |
| 1437303_at   | interleukin 6 signal transducer        | Il6st     | -2.22 | 3.09E-05 |
| 1424312_at   | adiponectin receptor 1                 | Adipor1   | -2.22 | 3.91E-07 |
| 1430476_at   | signal recognition particle 54B        | Srp54b    | -2.22 | 4.72E-06 |
| 1454182_at   | RIKEN cDNA 5430417C01 gene             | 5430417C0 | -2.21 | 3.70E-04 |
| 1439912_at   | RIKEN cDNA 9430098F02 gene ///         | 9430098F0 | -2.21 | 7.29E-05 |
| 1460241_a_at | ST3 beta-galactoside alpha-2,3-sialyl  | St3gal5   | -2.20 | 1.57E-04 |
| 1441698_at   | ---                                    | ---       | -2.20 | 4.33E-04 |
| 1418285_at   | ephrin B1                              | Efnb1     | -2.20 | 1.20E-04 |
| 1436882_at   | ubiquitin-like 5                       | Ubl5      | -2.20 | 2.16E-07 |
| 1435710_at   | expressed sequence AI661384            | AI661384  | -2.19 | 4.35E-05 |

|              |                                        |             |       |          |
|--------------|----------------------------------------|-------------|-------|----------|
| 1452907_at   | galactosylceramidase                   | Galc        | -2.19 | 1.13E-03 |
| 1459885_s_at | cytochrome c oxidase, subunit VIIC //  | Cox7c /// L | -2.18 | 5.73E-10 |
| 1425281_a_at | TSC22 domain family, member 3          | Tsc22d3     | -2.18 | 1.22E-04 |
| 1446786_at   | ---                                    | ---         | -2.17 | 1.01E-05 |
| 1437100_x_at | proviral integration site 3            | Pim3        | -2.17 | 3.97E-05 |
| 1454832_at   | phosphatase and actin regulator 1      | Phactr1     | -2.16 | 1.37E-06 |
| 1438911_at   | septin 7                               | 40428       | -2.16 | 3.74E-06 |
| 1454903_at   | nerve growth factor receptor (TNFR     | Ngfr        | -2.16 | 7.07E-06 |
| 1428289_at   | Kruppel-like factor 9                  | Klf9        | -2.16 | 3.74E-07 |
| 1420178_at   | ---                                    | ---         | -2.16 | 1.32E-06 |
| 1434350_at   | cysteine-serine-rich nuclear protein 1 | Csrnp1      | -2.15 | 3.42E-04 |
| 1433891_at   | leucine-rich repeat-containing G prot  | Lgr4        | -2.13 | 1.04E-05 |
| 1426767_at   | WD repeat domain 90                    | Wdr90       | -2.13 | 5.99E-04 |
| 1442347_at   | low density lipoprotein receptor-relat | Lrp8        | -2.13 | 1.61E-06 |
| 1439917_at   | PDZ domain containing 8                | Pdzd8       | -2.12 | 5.50E-04 |
| 1422398_at   | histone cluster 1, H1e                 | Hist1h1e    | -2.12 | 1.50E-05 |
| 1449207_a_at | kinesin family member 20A              | Kif20a      | -2.12 | 1.78E-05 |
| 1449147_at   | carbohydrate (keratan sulfate Gal-6)   | Chst1       | -2.11 | 5.30E-04 |
| 1448037_at   | Zinc finger, CCHC domain containin     | Zcchc6      | -2.11 | 3.10E-04 |
| 1452843_at   | interleukin 6 signal transducer        | Il6st       | -2.11 | 6.96E-04 |
| 1435293_at   | a disintegrin and metallopeptidase dc  | Adam22      | -2.11 | 1.13E-05 |
| 1434695_at   | denticleless homolog (Drosophila)      | Dtl         | -2.10 | 3.31E-06 |
| 1447643_x_at | snail homolog 2 (Drosophila)           | Snai2       | -2.10 | 9.51E-06 |
| 1437251_at   | cell division cycle associated 2       | Cdca2       | -2.10 | 2.03E-04 |
| 1439552_at   | triple functional domain (PTPRF inte   | Trio        | -2.09 | 6.49E-06 |
| 1427650_a_at | runt related transcription factor 1    | Runx1       | -2.09 | 3.72E-07 |
| 1429481_at   | non-catalytic region of tyrosine kinas | Nck2        | -2.08 | 2.32E-07 |
| 1431301_at   | proline rich 15                        | Prr15       | -2.08 | 3.45E-04 |
| 1452283_at   | Ras association (RalGDS/AF-6) dom      | Rassf8      | -2.07 | 3.06E-04 |
| 1448484_at   | S-adenosylmethionine decarboxylase     | Amd1        | -2.07 | 1.70E-06 |
| 1447434_at   | ---                                    | ---         | -2.07 | 1.60E-05 |
| 1458502_at   | ---                                    | ---         | -2.06 | 8.63E-05 |
| 1435396_at   | syntaxin binding protein 6 (amisyn)    | Stxbp6      | -2.06 | 5.34E-06 |
| 1437716_x_at | kinesin family member 22               | Kif22       | -2.06 | 5.63E-06 |
| 1444402_at   | zinc finger CCCH type containing 12    | Zc3h12c     | -2.06 | 7.94E-06 |
| 1422966_a_at | transferrin receptor                   | Tfrc        | -2.06 | 3.93E-04 |
| 1426869_at   | biregional cell adhesion molecule-rel  | Boc         | -2.05 | 1.61E-06 |
| 1430955_at   | RIKEN cDNA 2810403A07 gene             | 2810403A0   | -2.05 | 4.92E-04 |
| 1438076_at   | ---                                    | ---         | -2.05 | 3.81E-07 |
| 1452592_at   | microsomal glutathione S-transferase   | Mgst2       | -2.05 | 5.84E-07 |
| 1428288_at   | Kruppel-like factor 9                  | Klf9        | -2.05 | 6.54E-07 |
| 1448232_x_at | predicted gene 3756 /// predicted gen  | Gm3756 ///  | -2.04 | 8.17E-05 |
| 1446562_at   | ---                                    | ---         | -2.03 | 9.82E-08 |
| 1436909_at   | solute carrier family 25, member 44    | Slc25a44    | -2.03 | 2.45E-06 |
| 1444717_at   | ---                                    | ---         | -2.03 | 3.85E-04 |
| 1429156_at   | RIKEN cDNA 2610036L11 gene             | 2610036L1   | -2.02 | 1.38E-07 |
| 1446610_at   | engulfment and cell motility 1, ced-1  | Elmo1       | -2.01 | 3.44E-06 |
| 1429165_at   | RIKEN cDNA 3110001I22 gene             | 3110001I2   | -2.01 | 2.53E-04 |
| 1445298_at   | ---                                    | ---         | -2.01 | 1.14E-03 |

|              |                                       |          |       |          |
|--------------|---------------------------------------|----------|-------|----------|
| 1442629_at   | ---                                   | ---      | -2.00 | 4.08E-05 |
| 1436202_at   | metastasis associated lung adenocarc  | Malat1   | -2.00 | 8.71E-06 |
| <b>UP</b>    |                                       |          |       |          |
| 1426175_a_at | trypsin alpha/beta 1                  | Tpsab1   | 36.01 | 5.89E-08 |
| 1419717_at   | sema domain, immunoglobulin doma      | Sema3e   | 33.16 | 1.83E-09 |
| 1425967_a_at | mast cell protease 4                  | Mcpt4    | 28.55 | 8.33E-10 |
| 1454959_s_at | guanine nucleotide binding protein (G | Gnai1    | 20.17 | 1.61E-12 |
| 1448944_at   | neuropilin 1                          | Nrp1     | 14.43 | 2.41E-07 |
| 1427038_at   | preproenkephalin                      | Penk     | 14.34 | 1.07E-04 |
| 1417818_at   | WW domain containing transcription    | Wwtr1    | 13.09 | 2.27E-08 |
| 1438782_at   | contactin 4                           | Cntn4    | 12.79 | 3.95E-10 |
| 1448943_at   | neuropilin 1                          | Nrp1     | 12.40 | 1.18E-08 |
| 1427673_a_at | sema domain, immunoglobulin doma      | Sema3e   | 10.73 | 8.75E-10 |
| 1429559_at   | guanine nucleotide binding protein, a | Gnaq     | 8.38  | 1.32E-10 |
| 1460469_at   | tumor necrosis factor receptor superf | Tnfrsf9  | 8.05  | 3.75E-07 |
| 1428938_at   | guanine nucleotide binding protein, a | Gnaq     | 7.89  | 8.60E-12 |
| 1424704_at   | runt related transcription factor 2   | Runx2    | 7.77  | 7.13E-09 |
| 1420065_at   | Transketolase-like 1                  | Tktl1    | 7.42  | 1.42E-09 |
| 1458159_at   | ---                                   | ---      | 7.41  | 7.31E-08 |
| 1455729_at   | guanine nucleotide binding protein, a | Gnaq     | 7.32  | 2.25E-09 |
| 1417960_at   | cytoplasmic polyadenylation element   | Cpeb1    | 7.22  | 5.69E-09 |
| 1426873_s_at | junction plakoglobin                  | Jup      | 7.19  | 1.26E-11 |
| 1425814_a_at | calcitonin receptor-like              | Calcr1   | 6.59  | 1.18E-10 |
| 1428940_at   | guanine nucleotide binding protein, a | Gnaq     | 6.47  | 8.12E-07 |
| 1448664_a_at | SPEG complex locus                    | Spep     | 6.35  | 1.45E-08 |
| 1421688_a_at | chemokine (C-C motif) ligand 1        | Ccl1     | 6.14  | 5.92E-07 |
| 1428939_s_at | guanine nucleotide binding protein, a | Gnaq     | 6.09  | 5.28E-07 |
| 1450913_at   | UDP-Gal:betaGlcNAc beta 1,4-galac     | B4galt6  | 6.04  | 1.83E-06 |
| 1428034_a_at | tumor necrosis factor receptor superf | Tnfrsf9  | 5.81  | 7.10E-06 |
| 1437197_at   | sorbin and SH3 domain containing 2    | Sorbs2   | 5.78  | 7.22E-08 |
| 1435622_at   | heparan sulfate (glucosamine) 3-O-su  | Hs3st3a1 | 5.77  | 7.52E-08 |
| 1455450_at   | protein tyrosine phosphatase, non-red | Ptpn3    | 5.69  | 9.35E-09 |
| 1420064_s_at | transketolase-like 1                  | Tktl1    | 5.65  | 1.64E-07 |
| 1435758_at   | UDP-Gal:betaGlcNAc beta 1,4-galac     | B4galt6  | 5.63  | 3.30E-09 |
| 1460329_at   | UDP-Gal:betaGlcNAc beta 1,4-galac     | B4galt6  | 5.49  | 2.05E-07 |
| 1448213_at   | annexin A1                            | Anxa1    | 5.19  | 3.50E-08 |
| 1449567_at   | transketolase-like 1                  | Tktl1    | 5.11  | 7.59E-09 |
| 1435832_at   | leucine rich repeat containing 4      | Lrrc4    | 5.05  | 1.67E-06 |
| 1449049_at   | toll-like receptor 1                  | Tlr1     | 4.85  | 9.18E-11 |
| 1425906_a_at | sema domain, immunoglobulin doma      | Sema3e   | 4.47  | 1.49E-05 |
| 1435286_at   | Eph receptor A5                       | Epha5    | 4.47  | 2.29E-09 |
| 1418829_a_at | enolase 2, gamma neuronal             | Eno2     | 4.43  | 6.63E-08 |
| 1428914_at   | SH3 and PX domains 2A                 | Sh3pxd2a | 4.38  | 8.87E-08 |
| 1443518_at   | sarcoglycan, epsilon                  | Sgce     | 4.28  | 6.27E-08 |
| 1459205_at   | ---                                   | ---      | 4.25  | 1.18E-07 |
| 1449151_at   | cyclin-dependent kinase 18            | Cdk18    | 4.18  | 8.66E-06 |
| 1450272_at   | tumor necrosis factor (ligand) superf | Tnfsf8   | 4.00  | 3.93E-08 |
| 1420688_a_at | sarcoglycan, epsilon                  | Sgce     | 3.93  | 1.67E-10 |
| 1416097_at   | leucine rich repeat containing 4      | Lrrc4    | 3.84  | 1.77E-11 |

|              |                                          |            |      |          |
|--------------|------------------------------------------|------------|------|----------|
| 1421304_at   | killer cell lectin-like receptor, subfam | Klra2      | 3.79 | 3.83E-07 |
| 1452913_at   | Purkinje cell protein 4-like 1           | Pcp4l1     | 3.77 | 2.32E-04 |
| 1419564_at   | zinc finger protein 467                  | Zfp467     | 3.75 | 2.89E-10 |
| 1436044_at   | sodium channel, voltage-gated, type      | Scn7a      | 3.72 | 3.20E-10 |
| 1441727_s_at | zinc finger protein 467                  | Zfp467     | 3.71 | 4.53E-10 |
| 1450237_at   | deoxyribonuclease II beta                | Dnase2b    | 3.71 | 5.15E-09 |
| 1455849_at   | neuron navigator 1                       | Nav1       | 3.71 | 2.93E-07 |
| 1444690_at   | Eph receptor A5                          | Epha5      | 3.66 | 1.44E-06 |
| 1453721_a_at | solute carrier family 31, member 2       | Slc31a2    | 3.61 | 8.09E-09 |
| 1421256_at   | granzyme C                               | Gzmc       | 3.59 | 9.78E-05 |
| 1422166_at   | C-type lectin domain family 2, memb      | Clec2i     | 3.59 | 3.58E-10 |
| 1436043_at   | sodium channel, voltage-gated, type      | Scn7a      | 3.57 | 6.38E-06 |
| 1446497_at   | ---                                      | ---        | 3.55 | 3.74E-05 |
| 1416673_at   | beta-site APP-cleaving enzyme 2          | Bace2      | 3.55 | 3.46E-09 |
| 1435407_at   | Zinc finger with KRAB and SCAN d         | Zkscan16   | 3.48 | 2.57E-07 |
| 1422444_at   | integrin alpha 6                         | Itga6      | 3.48 | 1.22E-06 |
| 1418713_at   | pterin 4 alpha carbinolamine dehydra     | Pcbd1      | 3.46 | 1.34E-09 |
| 1427442_a_at | amyloid beta (A4) precursor protein      | App        | 3.45 | 9.36E-04 |
| 1441030_at   | retinoic acid induced 14                 | Rai14      | 3.45 | 9.84E-06 |
| 1454674_at   | fasciculation and elongation protein 2   | Fez1       | 3.42 | 2.71E-06 |
| 1442322_at   | ---                                      | ---        | 3.41 | 3.06E-06 |
| 1435394_s_at | ras homolog gene family, member C        | Rhoc       | 3.34 | 4.77E-08 |
| 1424769_s_at | caldesmon 1                              | Cald1      | 3.33 | 2.64E-06 |
| 1457923_at   | ---                                      | ---        | 3.31 | 1.69E-08 |
| 1432878_at   | RIKEN cDNA 4930544N03 gene               | 4930544N03 | 3.29 | 3.13E-05 |
| 1426260_a_at | UDP glucuronosyltransferase 1 famil      | Ugt1a1 /// | 3.29 | 3.74E-04 |
| 1456426_at   | ---                                      | ---        | 3.27 | 1.09E-07 |
| 1430386_at   | peptidylprolyl isomerase A pseudoge      | E030024N   | 3.25 | 7.77E-06 |
| 1438081_at   | mutated in colorectal cancers            | Mcc        | 3.23 | 8.70E-05 |
| 1440527_at   | ---                                      | ---        | 3.18 | 4.27E-07 |
| 1437920_at   | Eph receptor A5                          | Epha5      | 3.15 | 3.68E-09 |
| 1419329_at   | sorbin and SH3 domain containing 3       | Sorbs3     | 3.14 | 1.44E-07 |
| 1437846_x_at | beta-site APP-cleaving enzyme 2          | Bace2      | 3.14 | 1.42E-07 |
| 1415797_at   | discoidin domain receptor family, me     | Ddr1       | 3.11 | 5.98E-06 |
| 1458178_at   | ---                                      | ---        | 3.10 | 4.74E-06 |
| 1416635_at   | sphingomyelin phosphodiesterase, ac      | Smpdl3a    | 3.07 | 1.95E-07 |
| 1428861_at   | filamin A interacting protein 1-like     | Filip1l    | 3.07 | 9.86E-08 |
| 1438466_at   | dynein, axonemal, heavy chain 7B         | Dnahc7b    | 3.07 | 1.24E-07 |
| 1420557_at   | Eph receptor A5                          | Epha5      | 3.07 | 2.05E-06 |
| 1425760_a_at | phosphatidylinositol transfer protein,   | Pitpm1     | 3.06 | 3.90E-07 |
| 1417932_at   | interleukin 18                           | Il18       | 3.05 | 2.75E-05 |
| 1448845_at   | ribonuclease P 25 subunit (human)        | Rpp25      | 3.03 | 2.81E-05 |
| 1418406_at   | phosphodiesterase 8A                     | Pde8a      | 3.01 | 2.37E-09 |
| 1447616_at   | ---                                      | ---        | 3.00 | 1.30E-07 |
| 1435857_s_at | amyloid beta (A4) precursor-like pro     | Aplp1      | 2.97 | 2.61E-04 |
| 1442586_at   | suppressor of cytokine signaling 2       | Socs2      | 2.93 | 1.46E-05 |
| 1433617_s_at | UDP-Gal:betaGlcNAc beta 1,4-galac        | B4galt5    | 2.92 | 1.55E-06 |
| 1420859_at   | protein kinase inhibitor, alpha          | Pkia       | 2.91 | 1.76E-05 |
| 1424567_at   | tetraspanin 2                            | Tspan2     | 2.90 | 3.42E-06 |

|              |                                        |              |      |          |
|--------------|----------------------------------------|--------------|------|----------|
| 1451475_at   | plexin D1                              | Plxnd1       | 2.89 | 1.17E-07 |
| 1420802_at   | interleukin 13                         | Il13         | 2.87 | 8.49E-07 |
| 1422138_at   | plasminogen activator, urokinase       | Plau         | 2.86 | 2.51E-04 |
| 1432606_at   | RIKEN cDNA 2610012C04 gene             | 2610012C0    | 2.85 | 9.32E-08 |
| 1424594_at   | sterile alpha motif domain containing  | Samd4        | 2.83 | 3.75E-07 |
| 1416654_at   | solute carrier family 31, member 2     | Slc31a2      | 2.82 | 1.17E-08 |
| 1457491_at   | Pleckstrin homology domain containi    | Plekha1      | 2.81 | 7.32E-08 |
| 1455337_at   | FYVE, RhoGEF and PH domain con         | Fgd4         | 2.80 | 1.23E-06 |
| 1436907_at   | neuron navigator 1                     | Nav1         | 2.78 | 6.25E-07 |
| 1446392_at   | ---                                    | ---          | 2.77 | 2.49E-04 |
| 1458140_at   | slit homolog 2 (Drosophila)            | Slit2        | 2.77 | 6.38E-05 |
| 1429418_at   | CDC14 cell division cycle 14 homolo    | Cdc14b       | 2.75 | 1.30E-06 |
| 1437190_at   | serine/threonine/tyrosine kinase 1     | Styk1        | 2.75 | 1.23E-07 |
| 1417297_at   | inositol 1,4,5-triphosphate receptor 3 | Itp3         | 2.75 | 3.45E-06 |
| 1424659_at   | slit homolog 2 (Drosophila)            | Slit2        | 2.74 | 1.65E-05 |
| 1440650_at   | ---                                    | ---          | 2.73 | 9.29E-07 |
| 1417128_at   | pleckstrin homology domain containi    | Plekho1      | 2.69 | 4.65E-06 |
| 1428058_at   | AHNAK nucleoprotein (desmoyokin        | Ahnak        | 2.67 | 2.66E-05 |
| 1419978_s_at | DNA segment, Chr 10, ERATO Doi         | D10Ert61     | 2.67 | 4.48E-05 |
| 1448547_at   | Ras association (RalGDS/AF-6) dom      | Rassf3       | 2.66 | 8.99E-08 |
| 1444542_at   | ---                                    | ---          | 2.66 | 1.49E-05 |
| 1415892_at   | sphingosine phosphate lyase 1          | Sgpl1        | 2.66 | 7.82E-10 |
| 1457214_at   | ---                                    | ---          | 2.66 | 2.88E-06 |
| 1448892_at   | dedicator of cytokinesis 7             | Dock7        | 2.62 | 5.41E-06 |
| 1422711_a_at | pregnancy upregulated non-ubiquitou    | Pnck         | 2.59 | 1.66E-06 |
| 1421600_a_at | tripartite motif-containing 26         | Trim26       | 2.58 | 1.75E-05 |
| 1441482_at   | ---                                    | ---          | 2.57 | 3.76E-04 |
| 1433883_at   | tropomyosin 4                          | Tpm4         | 2.57 | 3.14E-09 |
| 1448596_at   | solute carrier family 6 (neurotransmi  | Slc6a8       | 2.55 | 1.07E-07 |
| 1460251_at   | Fas (TNF receptor superfamily mem      | Fas          | 2.55 | 4.91E-09 |
| 1426641_at   | tribbles homolog 2 (Drosophila)        | Trib2        | 2.54 | 1.61E-05 |
| 1429207_at   | RIKEN cDNA 5730408K05 gene             | 5730408K0    | 2.54 | 4.57E-09 |
| 1434399_at   | UDP-N-acetyl-alpha-D-galactosamin      | Galnt6 /// I | 2.53 | 5.29E-06 |
| 1440721_at   | RIKEN cDNA 5930433N17 gene             | 5930433N     | 2.52 | 2.93E-05 |
| 1434314_s_at | RAB11 family interacting protein 5 (   | Rab11fip5    | 2.52 | 3.74E-07 |
| 1428667_at   | monoamine oxidase A                    | Maoa         | 2.52 | 3.99E-06 |
| 1458039_at   | ---                                    | ---          | 2.51 | 3.20E-09 |
| 1459846_x_at | canopy 2 homolog (zebrafish)           | Cnpy2        | 2.50 | 2.09E-06 |
| 1429281_at   | RIKEN cDNA 2610008E11 gene             | 2610008E1    | 2.50 | 6.12E-07 |
| 1449164_at   | CD68 antigen                           | Cd68         | 2.49 | 1.89E-06 |
| 1451832_at   | chemokine-like factor                  | Cklf         | 2.49 | 9.67E-05 |
| 1455143_at   | neuroligin 2                           | Nlgn2        | 2.48 | 1.68E-06 |
| 1438027_at   | ---                                    | ---          | 2.48 | 7.53E-05 |
| 1446675_at   | adenosine kinase                       | Adk          | 2.46 | 3.29E-06 |
| 1451525_at   | Rho GTPase activating protein 12       | Arhgap12     | 2.46 | 8.43E-04 |
| 1447886_at   | RIKEN cDNA 0610040B09 gene             | 0610040B0    | 2.45 | 2.24E-04 |
| 1424542_at   | S100 calcium binding protein A4        | S100a4       | 2.45 | 7.99E-05 |
| 1417471_s_at | DNA segment, Chr 1, ERATO Doi 6        | D1Ert622     | 2.44 | 1.50E-07 |
| 1441576_at   | ---                                    | ---          | 2.43 | 3.04E-05 |

|              |                                        |           |      |          |
|--------------|----------------------------------------|-----------|------|----------|
| 1418407_at   | phosphodiesterase 8A                   | Pde8a     | 2.42 | 1.08E-03 |
| 1456593_at   | ---                                    | ---       | 2.42 | 1.11E-04 |
| 1418809_at   | paired-Ig-like receptor A2             | Pira2     | 2.39 | 8.10E-07 |
| 1421605_a_at | aquaporin 9                            | Aqp9      | 2.38 | 9.50E-05 |
| 1451474_a_at | poly (ADP-ribose) polymerase family    | Parp8     | 2.37 | 4.62E-07 |
| 1459744_at   | CD53 antigen                           | Cd53      | 2.36 | 1.56E-07 |
| 1438366_x_at | chloride channel 3                     | Clcn3     | 2.35 | 2.61E-05 |
| 1426640_s_at | tribbles homolog 2 (Drosophila)        | Trib2     | 2.34 | 1.62E-05 |
| 1447167_at   | ---                                    | ---       | 2.34 | 1.02E-05 |
| 1418483_a_at | glycoprotein galactosyltransferase al  | Ggta1     | 2.33 | 1.60E-06 |
| 1435271_at   | interferon regulatory factor 3         | Irf3      | 2.32 | 1.93E-06 |
| 1455175_at   | PHD finger protein 13                  | Phf13     | 2.32 | 7.43E-09 |
| 1459595_at   | ---                                    | ---       | 2.32 | 5.69E-09 |
| 1435402_at   | GRAM domain containing 1B              | Gramd1b   | 2.31 | 1.09E-07 |
| 1431980_a_at | arsenic (+3 oxidation state) methyltra | As3mt     | 2.31 | 3.30E-07 |
| 1425315_at   | dedicator of cytokinesis 7             | Dock7     | 2.31 | 5.98E-07 |
| 1448721_at   | DNA segment, Chr 1, ERATO Doi 6        | D1Ertd622 | 2.30 | 9.27E-07 |
| 1421309_at   | O-6-methylguanine-DNA methyltran       | Mgmt      | 2.30 | 2.05E-08 |
| 1454933_at   | family with sequence similarity 176,   | Fam176b   | 2.30 | 1.48E-08 |
| 1449187_at   | platelet derived growth factor, alpha  | Pdgfa     | 2.29 | 5.11E-07 |
| 1432417_a_at | tetraspanin 2                          | Tspan2    | 2.29 | 1.00E-06 |
| 1459362_at   | ---                                    | ---       | 2.28 | 4.76E-04 |
| 1417903_at   | deafness, autosomal dominant 5 (hun    | Dfna5     | 2.27 | 4.53E-09 |
| 1436636_at   | ---                                    | ---       | 2.27 | 2.36E-07 |
| 1421594_a_at | synaptotagmin-like 2                   | Sytl2     | 2.26 | 2.14E-07 |
| 1459238_at   | ---                                    | ---       | 2.26 | 5.23E-07 |
| 1424133_at   | transmembrane protein 98               | Tmem98    | 2.26 | 1.32E-06 |
| 1442157_at   | ---                                    | ---       | 2.24 | 6.12E-05 |
| 1439937_at   | Transmembrane 9 superfamily memb       | Tm9sf1    | 2.24 | 7.69E-06 |
| 1447962_at   | ---                                    | ---       | 2.24 | 1.33E-06 |
| 1458188_at   | ---                                    | ---       | 2.24 | 1.27E-04 |
| 1427405_s_at | RAB11 family interacting protein 5 (   | Rab11fip5 | 2.23 | 4.27E-04 |
| 1445370_at   | ---                                    | ---       | 2.23 | 1.15E-06 |
| 1449688_at   | DNA segment, Chr 10, ERATO Doi         | D10Ertd61 | 2.22 | 3.91E-04 |
| 1441589_at   | ---                                    | ---       | 2.21 | 1.20E-04 |
| 1450436_s_at | DnaJ (Hsp40) homolog, subfamily B      | Dnajb5    | 2.21 | 1.91E-05 |
| 1450355_a_at | capping protein (actin filament), gels | Capg      | 2.20 | 1.71E-08 |
| 1438800_at   | N-acetylglucosamine kinase             | Nagk      | 2.20 | 2.00E-04 |
| 1443162_at   | ---                                    | ---       | 2.19 | 1.78E-04 |
| 1437070_at   | CDC14 cell division cycle 14 homolo    | Cdc14b    | 2.19 | 1.63E-07 |
| 1429831_at   | phosphoinositide-3-kinase adaptor pr   | Pik3ap1   | 2.19 | 6.32E-05 |
| 1447315_at   | ---                                    | ---       | 2.18 | 1.05E-04 |
| 1444752_at   | RIKEN cDNA C230073G13 gene             | C230073G  | 2.17 | 9.02E-04 |
| 1455615_at   | chemokine-like factor                  | Cklf      | 2.17 | 7.91E-05 |
| 1434291_a_at | small EDRK-rich factor 1               | Serf1     | 2.17 | 1.03E-05 |
| 1451486_at   | solute carrier family 46, member 3     | Slc46a3   | 2.16 | 7.58E-06 |
| 1445105_at   | ---                                    | ---       | 2.16 | 1.28E-04 |
| 1421598_at   | ---                                    | ---       | 2.15 | 2.51E-06 |
| 1417558_at   | Fyn proto-oncogene                     | Fyn       | 2.14 | 7.47E-06 |

|              |                                         |              |      |          |
|--------------|-----------------------------------------|--------------|------|----------|
| 1435692_at   | potassium channel tetramerisation do    | Kctd21       | 2.13 | 1.03E-05 |
| 1442800_x_at | family with sequence similarity 181,    | Fam181b      | 2.13 | 3.97E-04 |
| 1460457_at   | RIKEN cDNA 2810405F17 gene              | 2810405F1    | 2.13 | 6.60E-04 |
| 1435461_at   | membrane associated guanylate kinase    | Magi3        | 2.12 | 1.78E-04 |
| 1424970_at   | purine-rich element binding protein C   | Purg         | 2.12 | 5.14E-09 |
| 1444613_at   | ---                                     | ---          | 2.11 | 1.14E-04 |
| 1437724_x_at | phosphatidylinositol transfer protein,  | Pitpnm1      | 2.11 | 5.63E-08 |
| 1452487_x_at | paired-Ig-like receptor A2              | Pira2        | 2.11 | 3.03E-05 |
| 1425769_x_at | chemokine-like factor                   | Cklf         | 2.10 | 1.33E-05 |
| 1437477_at   | leucine rich repeat (in FLII) interacti | Lrrfip1      | 2.10 | 5.97E-09 |
| 1423602_at   | TNF receptor-associated factor 1        | Traf1        | 2.10 | 7.96E-06 |
| 1424568_at   | tetraspanin 2                           | Tspan2       | 2.10 | 5.77E-08 |
| 1452847_at   | GATS protein-like 3                     | Gatsl3       | 2.09 | 2.67E-05 |
| 1441418_at   | ---                                     | ---          | 2.09 | 1.14E-03 |
| 1417327_at   | caveolin 2                              | Cav2         | 2.08 | 5.96E-05 |
| 1459649_at   | ---                                     | ---          | 2.07 | 9.31E-04 |
| 1440304_at   | ---                                     | ---          | 2.06 | 4.19E-06 |
| 1433558_at   | disabled homolog 2 (Drosophila) inte    | Dab2ip       | 2.06 | 1.13E-06 |
| 1458501_at   | vesicle-associated membrane protein     | Vapb         | 2.06 | 5.31E-05 |
| 1416473_a_at | immunoglobulin superfamily, DCC s       | Igdcc4       | 2.05 | 2.90E-05 |
| 1441370_at   | Transmembrane and coiled coil doma      | Tmcc1        | 2.05 | 6.15E-05 |
| 1427424_at   | UDP-N-acetyl-alpha-D-galactosamin       | Galnt6 /// I | 2.05 | 4.83E-06 |
| 1448765_at   | Fyn proto-oncogene                      | Fyn          | 2.05 | 1.23E-06 |
| 1446911_at   | ---                                     | ---          | 2.05 | 7.57E-05 |
| 1420464_s_at | predicted pseudogene 10693 /// predi    | Gm10693 /    | 2.04 | 3.45E-06 |
| 1449602_at   | ---                                     | ---          | 2.04 | 4.95E-06 |
| 1442073_at   | inositol polyphosphate-1-phosphatas     | Inpp1        | 2.04 | 1.36E-04 |
| 1453016_at   | heat shock protein family B (small),    | Hspb11       | 2.04 | 5.38E-07 |
| 1418072_at   | histone cluster 1, H2bc                 | Hist1h2bc    | 2.03 | 3.85E-08 |
| 1421444_at   | progesterone receptor                   | Pgr          | 2.03 | 7.49E-05 |
| 1460696_at   | cDNA sequence BC026585                  | BC026585     | 2.03 | 1.31E-06 |
| 1444777_at   | Retinoic acid induced 14                | Rai14        | 2.01 | 7.28E-05 |
| 1445460_at   | ---                                     | ---          | 2.01 | 9.98E-04 |
| 1442605_at   | ---                                     | ---          | 2.01 | 1.43E-04 |
| 1429671_at   | SCAN domain containing 3                | Scand3       | 2.00 | 1.68E-04 |
