# Supplementary material
Source: PubMed Central journal article supplement (PMC3358494)
Supplement: NIHMS367883-supplement-3.pdf [file NIHMS367883-supplement-3.pdf]

A

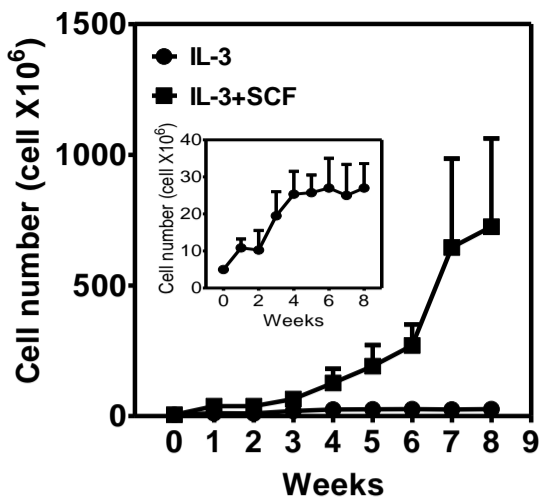

B IL-3-cultured cells

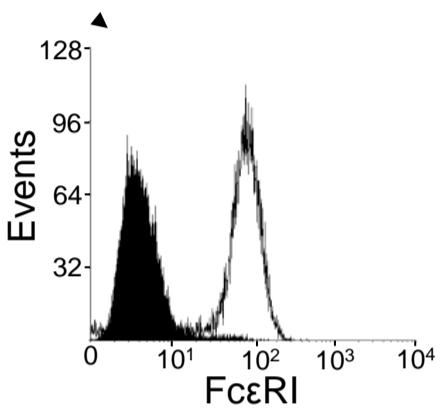

C IL-3+SCF-cultured cells

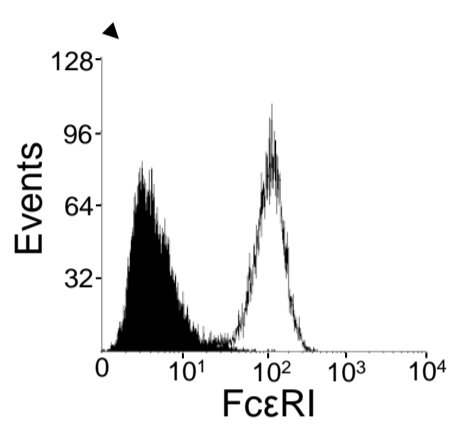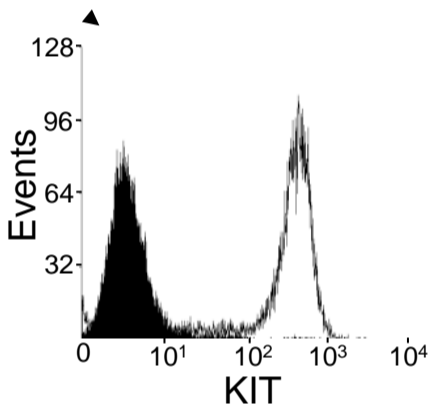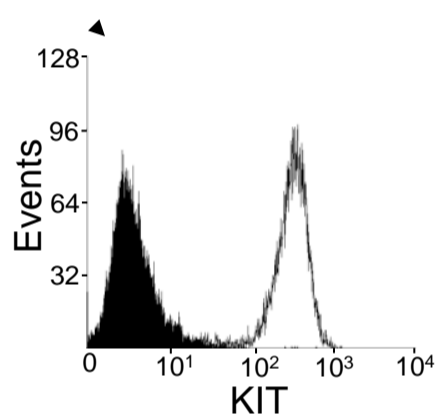

D

Culture conditions

Stain

x40

x100

IL-3

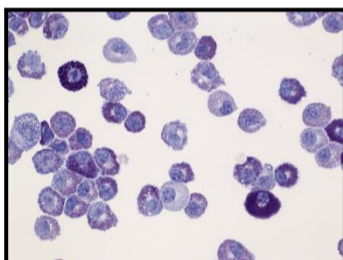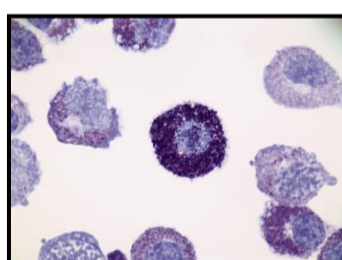

IL-3+SCF

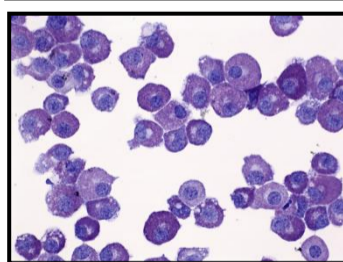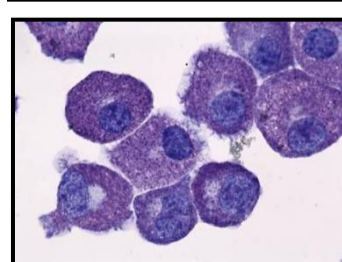

Toluidine blue

E

IL-3

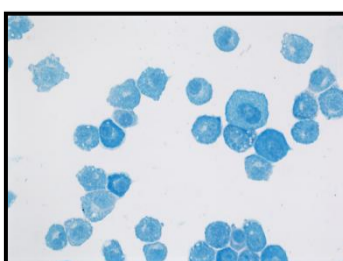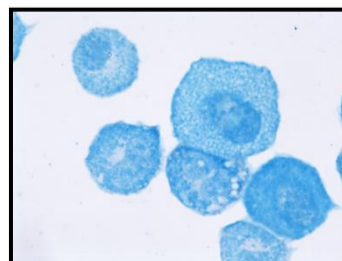

IL-3+SCF

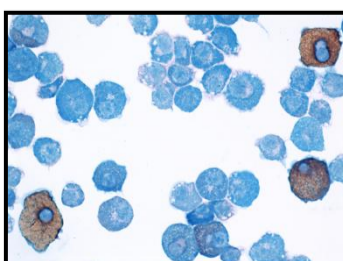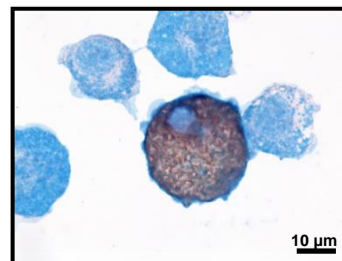

Safranin/  
Alcian blue

Figure S1
