# Supplementary material
Source: PubMed Central journal article supplement (PMC3358494)

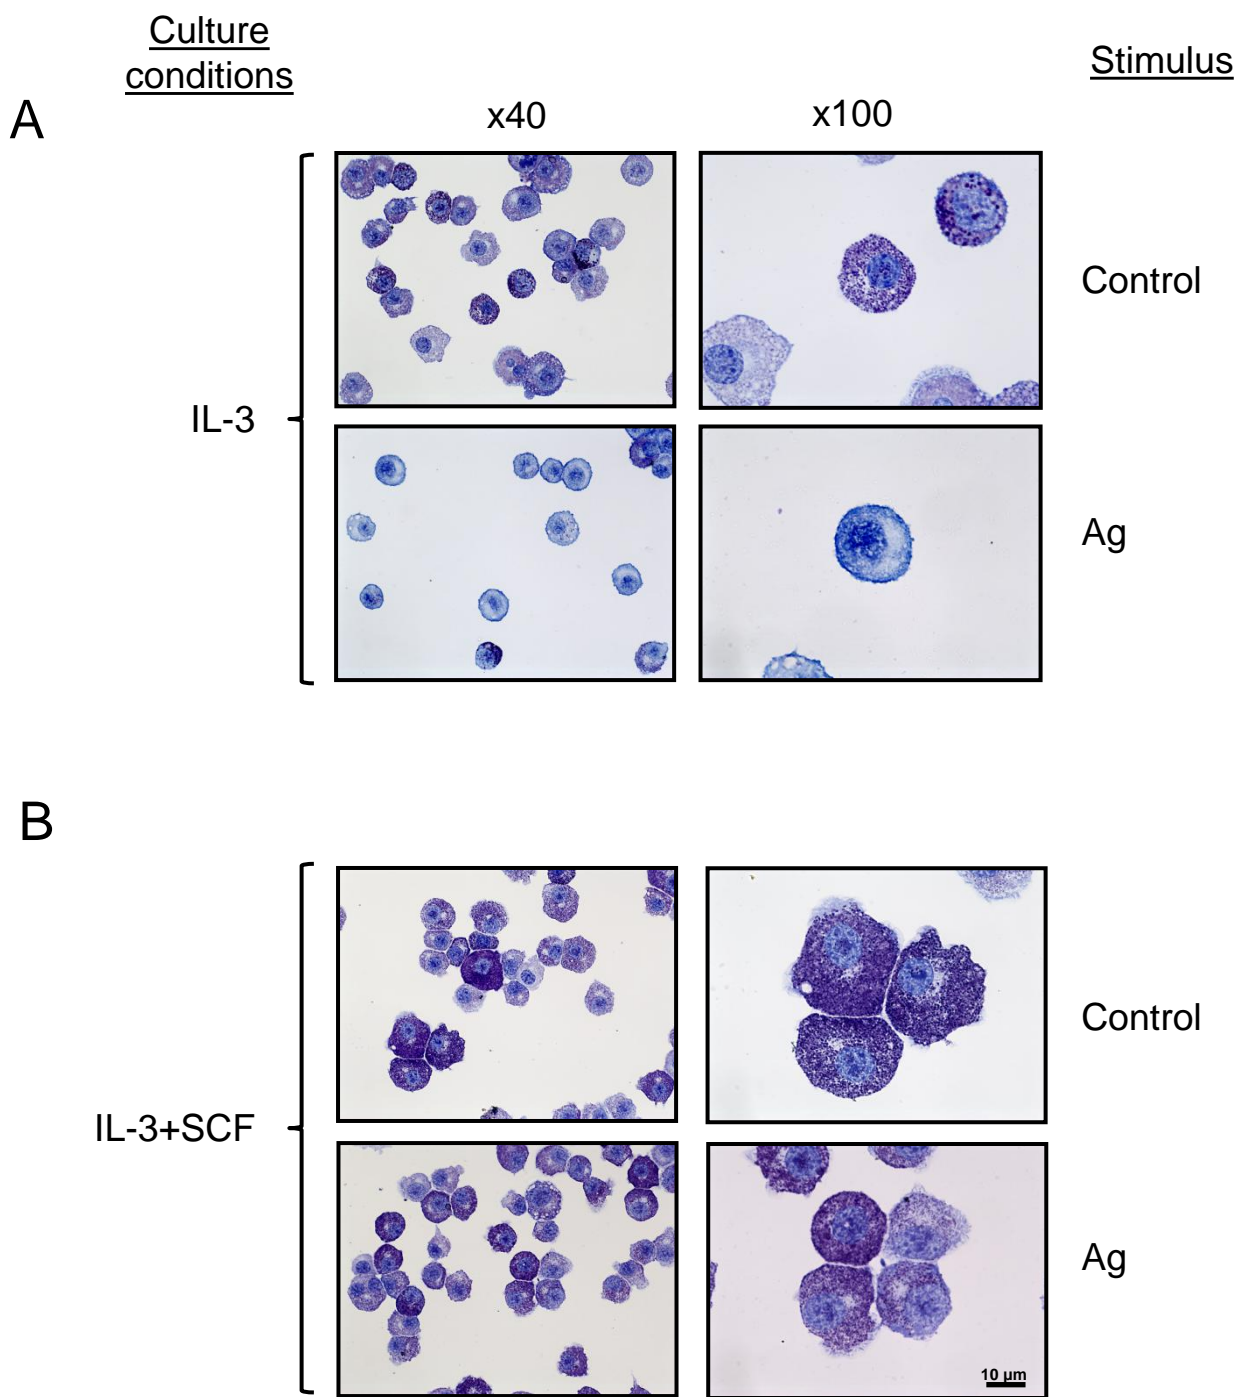

Figure S2

Supplement: NIHMS367883-supplement-4.pdf [file NIHMS367883-supplement-4.pdf]

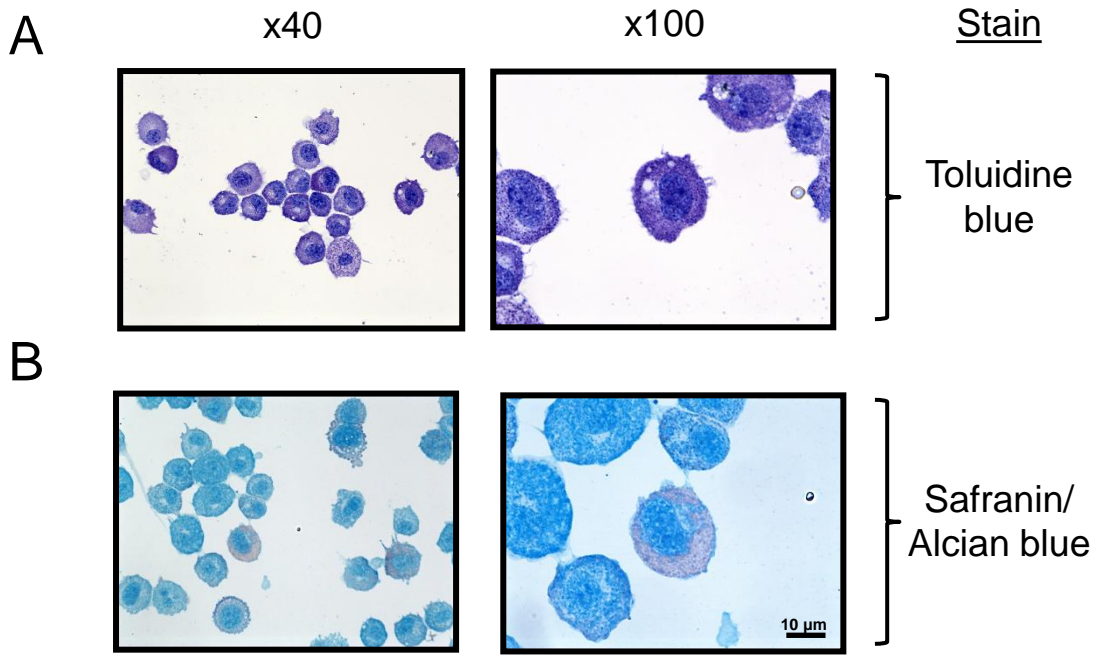

**C**                      Released cytokines

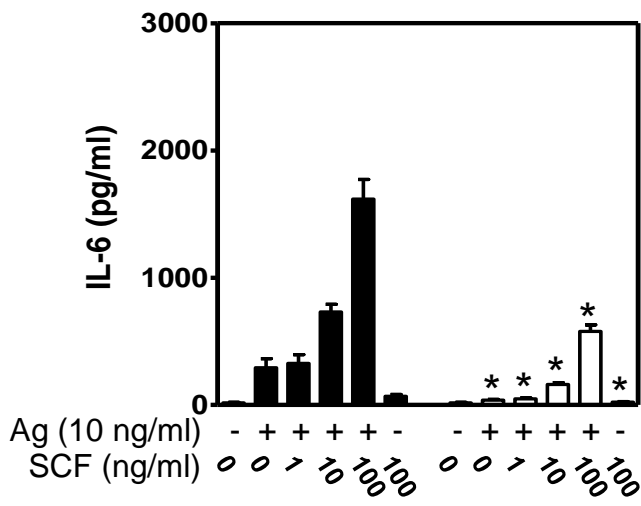

**D**                      Retained cytokines

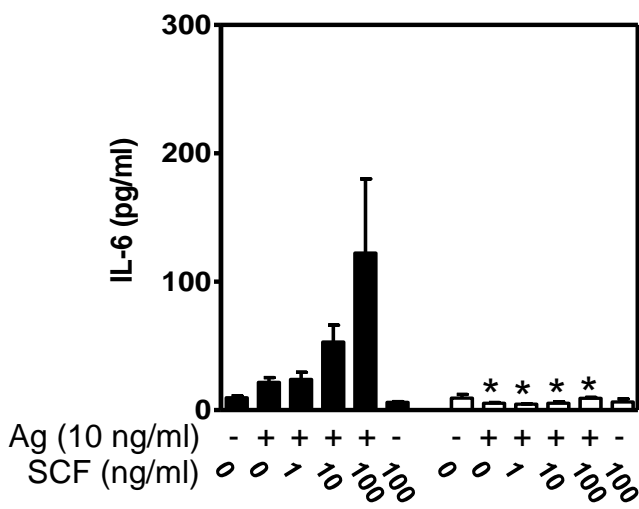

Figure S3

Supplement: NIHMS367883-supplement-5.pdf [file NIHMS367883-supplement-5.pdf]
